# Supplementary material
Source: PubMed Central journal article supplement (PMC3375924)
Supplement: supp_pp.112.195214_195214Supp_Fig_1.pdf [file supp_pp.112.195214_195214Supp_Fig_1.pdf]

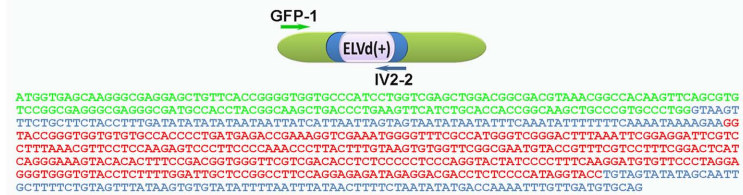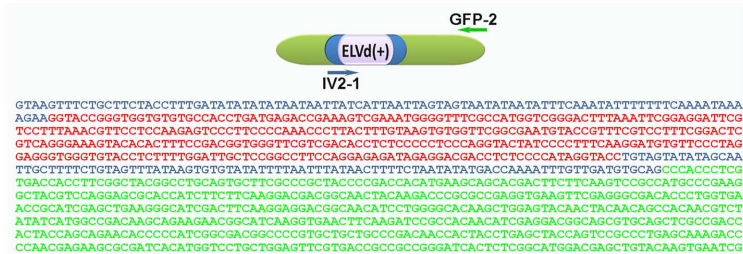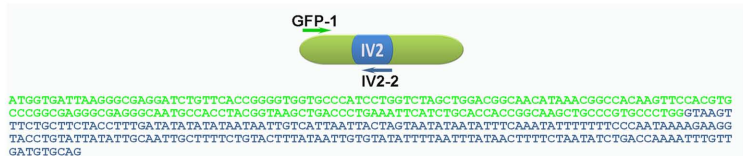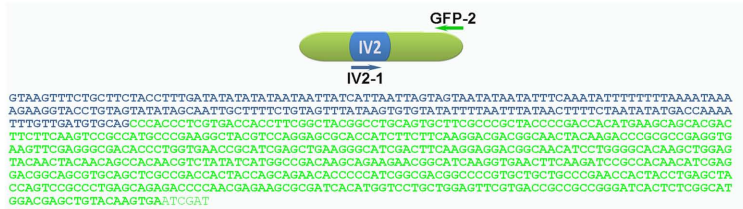

**Supporting Figure 1:** Total DNA sequence of the chimeric transcripts recovered from systemically infected leaves 25 days post-inoculation. The bands amplified by RT-PCR and shown in Figure 3 were extracted from the gel, cloned in pGen vector and sequenced to confirm their stability in the chimeric construct. Red text: ELVd sequence, blue text: IV2 sequence and green text: GFP sequence. A graphical representation of the amplification products is also shown to facilitate their association with Figure 3.
