# Supplementary material
Source: PubMed Central journal article supplement (PMC3375924)
Supplement: supp_pp.112.195214_195214Supp_Fig_2.pdf [file supp_pp.112.195214_195214Supp_Fig_2.pdf]

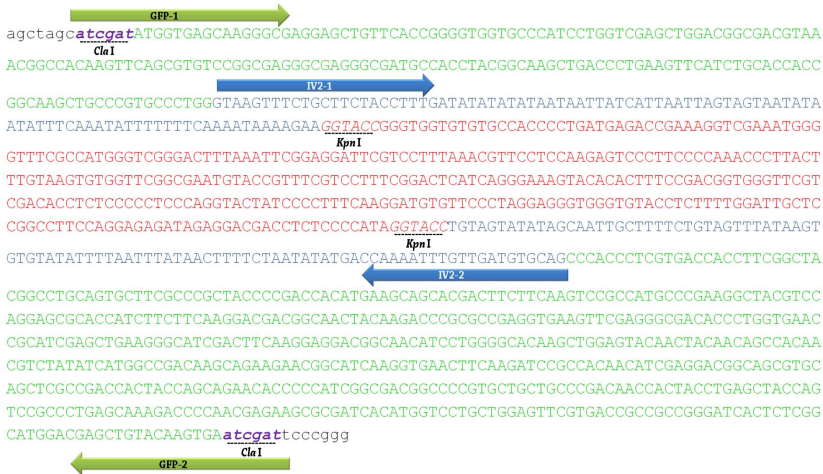

**Supporting Figure 2:** Partial DNA sequence of the PVX-GFP/IV2/ELVd(+) construct used in this study. GFP (green text), IV2 (blue text) and ELVd (red text) cDNA sequences are shown according to their cloning position in the chimeric vector. The arrows (blue for IV2 and green for GFP cDNA) indicate the position of the primers employed in the RT-PCR analysis of the infected plants. The Cla I and Kpn I sites used for cloning are shown as underlined text.
