# Supplementary material
Source: PubMed Central journal article supplement (PMC3375924)
Supplement: supp_pp.112.195214_195214Supp_Fig_3.pdf [file supp_pp.112.195214_195214Supp_Fig_3.pdf]

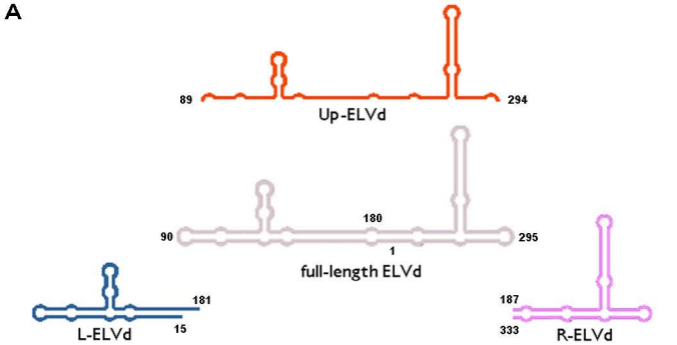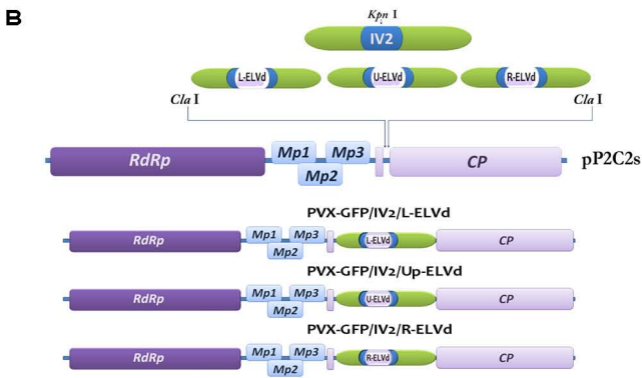

**C**

*GFP/IV2/L-ELVd*  
 CACAAGTTCAGCGTGTCCGGCAGGGCGAGGGCGATGCCACCTACGGCAAGCTGACCCTGAAAGTTCATCTGCACCACCGGCAAGCTGCCCGTGCCTGGGT  
 AAGTTTCGCTTCTACCTTTGATATATATAATAATATCATTAAATAGTAGTAATAATAATTTCAAATATTTTTTCAAATAAAAAAGAGGTACCC  
 CTGATGAGTCCGAAAGGACGAAACGGTACATTCGCCAACCACACTTACAAGTAAGGGTTTTGGGGAAGGGACTCTTGGAGGAACGTTTTAAAGGACGAATC  
 CTCGGAATTTAAAGTCCGACCCATGGCGAAACCCCAATTCGACCTTTTCGGTCTCATCAGGGGTGGTACC TGTAGTATATAGCAATTCCTTTCTGTAGTT  
 TATAAGTGTGATATTTTAAATTTATAAATCTTTCTAATATATGACCAAAATTTGTTGATGTGCAGCCACCCCTCGTGACCACCTTCGGCTACGGCTGCAGTCTCGCCG  
 GCTTCGCCCGCTACCCCGACCATGAAGCAGCAGACTTCTTCAAGTCCGCCATGCCCGAAGGCTACGTCCAGGAGCGCACCATCTTCTTCAAAGGACGAC  
 GGCAACTACAAGACCCGCGCGAGGTGAAG

*GFP/IV2/R-ELVd*  
 CACAAGTTCAGCGTGTCCGGCAGGGCGAGGGCGATGCCACCTACGGCAAGCTGACCCTGAAAGTTCATCTGCACCACCGGCAAGCTGCCCGTGCCTGGGT  
 AAGTTTCGCTTCTACCTTTGATATATATAATAATATCATTAAATAGTAGTAATAATAATTTCAAATATTTTTTCAAATAAAAAAGAGGTACCC  
 CACTTTCGACGGTGGGTTCTGTCGACACCTCTCCCTCCAGGTAATATCCCTTTCAAGGATGTGTTCCTTAGGAGGGTGGGTGACTCTTTTGGATT  
 GCTCCGGCTTCAGGAGAGATAGAGGACACCTCTCCCATAGGGTGGTGTGGTACC TGTAGTATATAGCAATTCCTTTCTGTAGTTTATAAGTGTG  
 TATATTTAAATTTATAAATCTTTCTAATATATGACCAAAATTTGTTGATGTGCAGCCACCCCTCGTGACCACCTTCGGCTACGGCTGCAGTCTCGCCG  
 CTACCCCGACCATGAAGCAGCAGACTTCTTCAAGTCCGCCATGCCCGAAGGCTACGTCCAGGAGCGCACCATCTTCTTCAAAGGACGACGGCAACTCA  
 AGACCCGCGCGAGGTGAAGTTCGAGGGCG

*GFP/IV2/Up-ELVd*  
 CACAAGTTCAGCGTGTCCGGCAGGGCGAGGGCGATGCCACCTACGGCAAGCTGACCCTGAAAGTTCATCTGCACCACCGGCAAGCTGCCCGTGCCTGGGT  
 AAGTTTCGCTTCTACCTTTGATATATATAATAATATCATTAAATAGTAGTAATAATAATTTCAAATATTTTTTCAAATAAAAAAGAGGTACCC  
 AACGTTCTCCAAAGTCCCTTCCCAAACCCCTACTTTGTAAGTGTGGTTCGGCGAATGTACCGTTTCGTCTTTTCGGACTCATCAGGGAAGTACACAC  
 TTTCCGACGGTGGGTTCTGTCGACACCTCTCCCTCCAGGTAATATCCCTTTCAAGGATGTGTTCCTTAGGAGGGTGGGTGACTCTTTTGGATTGCT  
 CGGTACC TGTAGTATATAGCAATTCCTTTCTGTAGTTTATAAGTGTGATATTTTAAATTTATAAATCTTTCTAATATATGACCAAAATTTGTTGATGTGCA  
 GCCACCCCTCGTGACCACCTTCGGCTACGGCTGCAGTGTCTTCGCCCGCTACCCCGACCATGAAGCAGCAGACTTCTTCAAGTCCGCCATGCCCGAAG  
 GCTACTCCAGGAGCGCACCATCTTCTCA

**Supporting Figure 3:** A) schematic representation of the three arbitrary regions in that the ELVd was dissected. B) PVX-based vector P2C2S and cDNAs (GFP/IV2/L-ELVd, GFP/IV2/R-ELVd and GFP/IV2/Up-ELVd) cloned under the control of the duplicated PVX-CP promoter. The chimeric vectors PVX-GFP/IV2/L-ELVd, PVX-GFP/IV2/R-ELVd and PVX-GFP/IV2/Up-ELVd are not drawn to scale. C) Partial sequences of the constructs used in this study. GFP (green text), IV2 (blue text) and partial-length ELVd (red text) cDNA sequences are shown according their cloning position in the vector. The *Kpn* I site used for (L, R and Up) ELVd cloning is shown in gray text.
