# Supplementary material
Source: PubMed Central journal article supplement (PMC3375924)
Supplement: supp_pp.112.195214_195214Supp_Fig_4.pdf [file supp_pp.112.195214_195214Supp_Fig_4.pdf]

**A**

*tatataa*ggaagttcatttcatttggagagggtttttattttaatttctttcaaatacttccaggatcGGTACCgggt  
 ggtgtgtgccacccctgatgagaccgaaaaggtcgaaatggggtttcgcatgggtcgggactttaaatcggaggattcg  
 tcctttaaacgttcctccaagatcccttccccaacccttactttgtaagtgtggttcggcgaatgtaccgtttcgtcc  
 tttcggactcatcagggaaagtacacactttccgacgggtgggttcgtogacacctctccccctcccaggtactatccct  
 ttcaaggatgtgttccttaggaggtgggtgtacctctttggattgtccggccttccaggagagatagaggacgacct  
 ctccccataATGGGATCCGTGAGCAAGGGCCGAGGAGCTGTTACCGGGGTGGTACCTGCCCACCTGGTTCGAGCTGGACGGCGA  
CGTAAACGGCCACAAGTTTCAGCGTGTCCGGCGAGGGCGAGGGCGATGCCACCTACGGCAAGCTGACCTGAAAGTTCATCT  
GCACCACGGCCAAGCTGCCCGTGCCTTGGCCACCCCTCGTGACCACCTTCGGCTACGGCTGCAGTGCCTCGCCCGTAC  
CCCGACCACATGAAGCAGCAGCATTCTTCAAGTCGCGCCATGCCCGAAGGCTACGTCAGGAGCGCACCATCTTCTCAA  
GGACGACGGCAACTACAAGACCCCGCGAGGTGAAGTTCGAGGGCGACACCCTGGTGAACCGCATCGAGCTGAAGGGCA  
TCGACTTCAAGGAGGACGGCAACATCTTGGGGCACAAGCTGGAGTACAACATAACAGCCACAACGCTTATATCATGGCC  
GACAAGCAGAAGAACCGCATCAAGGTGAAGTTCAGATCCGCCACAACATCGAGGACGGCAGCGTGCAGCTCGCCGACCA  
CTACCAGCAGAACACCCCATCGGGCAGGCCCGGTGCTGTGCCCGACAACCACTACCTGAGCTACCAGTCCGCCCTGA  
GCGAAGACCCCAACGAGAAGCGGATCACATGGTCTGTGGAGTTCGTGACCGCCCGGGATCACTCTCGGCATGGAC  
GAGCTGTACAAGTGA

**B**

gwcvpplmrpkgrngvspwvgtlnsedssfrssksfpkplllckgsanvpfrpfgliresthfptvgsstplplpgti  
 pfqgcvpStopeggctsfllrpsrrdrgrplipiMetGSVSKGEELFTGVVPLVLELDGDVNGHKFSVSGEGEGDATYGK  
 LTLKFICTTGKLPVPWPTLVTTFYGLQCFAFYPDHMKQHDFFKSAMPEGYVQERTIFPKDDGNYKTRAEVKFEQDTLVN  
 RIELKGIIDFKEDGNILGHKLEYNYNSHNVYIMADKQKNGIKVNFKIRHNIEDGSVQLADHYQQNTPIIGDGPVLLPDNHYL  
 SYQSALSEDPNEKRDMVLLLEFVTAAGITLGMDELYKStop

**Supporting Figure 4:** Partial DNA sequence of the ELVd-5'UTR/GFP construct. A) Partial 35S promoter (black text), full-length ELVd(+) (red text) and modified GFP (green text) cDNA sequences are shown. The Bam HI sites used for transcriptional fusions of the ELVd-5'UTR end in the GFP open reading frame are underlined. B) In silico predicted translation of the ELVd-5'UTR-GFP transcript.
